# Supplementary material for: Phosphorus Adsorption on Blast Furnace Slag with Different Magnetism and Its Potential for Phosphorus Recovery
Source: MDPI journal article supplement (doi:10.3390/w14162452), 2022-08-09
Supplement: s1 [file s1]

Archive with 1 entries (1 files):
- water-1803667-supplementary.pdf
