# Supplementary material for: Phosphorus Adsorption on Blast Furnace Slag with Different Magnetism and Its Potential for Phosphorus Recovery
Source: MDPI journal article supplement (doi:10.3390/w14162452), 2022-08-09
Supplement: s1 [file s1 › water-1803667-supplementary.pdf]

## Supporting information

# Phosphorus adsorption on blast furnace slag with different magnetism and its potential for phosphorus recovery

Xiaoxin Wu<sup>1</sup>, Rui Zhan<sup>2</sup>, Lili Liu<sup>2,\*</sup>, Jinjing Lan<sup>3</sup>, Ning Zhao<sup>1</sup>, Zhiping Wang<sup>1,3,\*</sup>

<sup>1</sup> China-UK low Carbon college, Shanghai Jiao Tong University, Shanghai 200240, China; wu-xiaoxin@sjtu.edu.cn (X.W.); 17866624931@163.com (N.Z.)

<sup>2</sup> State Environmental Protection Key Laboratory of Environmental Risk Assessment and Control on Chemical Process, East China University of Science and Technology, Shanghai 200237, China; 18321687229@163.com (R.Z.)

<sup>3</sup> School of Environmental Science and Engineering, Shanghai Jiao Tong University, Shanghai 200240, China; arana-lan@sjtu.edu.cn (J.L.)

\* Correspondence: wangzply@sjtu.edu.cn (Z.W.); lilyliu@ecust.edu.cn (L.L.)

**Total page: 9**

**Tables :**

**Table S1.** XRF determination revealed the Surface chemical composites of BFS with size of 1.0-2.0 mm.

**Table S2.** Binding energy and atomic composition of P in surface of BFS.

**Table S3.** Results of the Thomas model at different influent P concentration.

**Table S4.** Results of the Thomas model at different influent pH.

**Table S5.** Results of the Thomas model at different HRT.

**Figures:**

**Figure S1.** SEM-EDS detection of non-magnetic BFS1 after phosphorus adsorption.

**Figure S2.** The fluorescent components of urban sewage identified with PARAFAC analysis.

**Table S1.** XRF determination revealed the Surface chemical composites of BFS with size of 1.0-2.0 mm (Atomic percentage).

|          | <b>Fe %</b> | <b>Mn %</b> | <b>Al %</b> | <b>Si %</b> | <b>K %</b> |
|----------|-------------|-------------|-------------|-------------|------------|
| <b>a</b> | 22.34       | 41.42       | 11.62       | 20.67       | 2.12       |
| <b>b</b> | 24.79       | 27.53       | 12.86       | 30.29       | 2.95       |
| <b>c</b> | 25.46       | 43.46       | 15.21       | 12.67       | 1.35       |
| <b>d</b> | 9.78        | 6.72        | 15.05       | 65.31       | 1.70       |
| <b>e</b> | 10.36       | 13.48       | 18.80       | 52.42       | 2.36       |
| <b>f</b> | 9.50        | 0.59        | 6.16        | 78.51       | 4.31       |

a.Magnetic BFS before adsorption; b. Magnetic BFS after adsorption; c. Magnetic BFS after leaching; c. Non-magnetic BFS before adsorption; d. Non-magnetic BFS after adsorption; e. Non-magnetic BFS after leaching.

**Table S2.** Binding energy and atomic composition of P in surface of BFS

| Samples | B.E. (eV)                      |                                             | Atomic composition (%)         |                                             |
|---------|--------------------------------|---------------------------------------------|--------------------------------|---------------------------------------------|
|         | HPO <sub>4</sub> <sup>2-</sup> | H <sub>2</sub> PO <sub>4</sub> <sup>-</sup> | HPO <sub>4</sub> <sup>2-</sup> | H <sub>2</sub> PO <sub>4</sub> <sup>-</sup> |
| BFS-3   | 133.3                          | 134.17                                      | 0.38                           | 0.19                                        |
| BFS-4   | 133.58                         | 134.45                                      | 0.44                           | 0.22                                        |
| BFS-5   | 132.87                         | 133.74                                      | 0.20                           | 0.10                                        |
| BFS-6   | 133.29                         | 134.16                                      | 0.07                           | 0.04                                        |

\*BFS1 were separated as the magnetic samples (BFS-1, 3, 5) and non-magnetic samples (BFS-2, 4, 6), which were detected with the XPS as before P adsorption (BFS-1, 2) and after P adsorption (BFS-3, 4), as well as the regenerated samples (BFS-5, 6).

**Table S3.** Results of the Thomas model at different influent P concentration

| $C_0(\text{mg L}^{-1})$ | $K_{\text{Th}} (\text{L} \cdot \text{mg}^{-1} \cdot \text{d}^{-1})$ | $q_0 (\text{mg g}^{-1})$ | $R^2$  |
|-------------------------|---------------------------------------------------------------------|--------------------------|--------|
| 5                       | 0.5011                                                              | 0.0726                   | 0.9657 |
| 10                      | 0.2509                                                              | 0.1461                   | 0.9773 |
| 20                      | 0.1249                                                              | 0.2848                   | 0.9841 |

\* The adsorption column was filled with 1675g BFS1, fed with  $C_0=5.0, 10.0$  and  $20 \text{ mg L}^{-1}$  P solution and pH 7.0. The HRT was set as 2 hours, corresponded to filtration rate of  $0.5 \text{ m h}^{-1}$ .

**Table S4.** Results of the Thomas model at different influent pH

| pH | $K_{Th}$ (L·mg <sup>-1</sup> ·d <sup>-1</sup> ) | $q_0$ (mg g <sup>-1</sup> ) | R <sup>2</sup> |
|----|-------------------------------------------------|-----------------------------|----------------|
| 4  | 0.1986                                          | 0.1350                      | 0.9969         |
| 7  | 0.2509                                          | 0.1461                      | 0.9773         |
| 9  | 0.2609                                          | 0.1402                      | 0.9854         |

\* The adsorption column was filled with 1675g BFS1, fed with C0=10.0 mg L<sup>-1</sup> P solution and pH of 4.0, 7.0 and 9.0. The HRT was set as 2 hours, corresponded to filtration rate of 0.5m h<sup>-1</sup>.

**Table S5.** Results of the Thomas model at different HRT

| HRT (h) | $K_{Th}$ (L·mg <sup>-1</sup> ·d <sup>-1</sup> ) | $q_0$ (mg g <sup>-1</sup> ) | $R^2$  |
|---------|-------------------------------------------------|-----------------------------|--------|
| 2       | 0.2325                                          | 0.1528                      | 0.9707 |
| 4       | 0.1322                                          | 0.1412                      | 0.9576 |

\* The adsorption column was filled with 1675g BFS1, fed with  $C_0=10.0$  mg L<sup>-1</sup> P solution and pH 7.0. The filtration rate was set as 0.5 and 0.25 m h<sup>-1</sup>, corresponded to HRT about 2 and 4 hours.

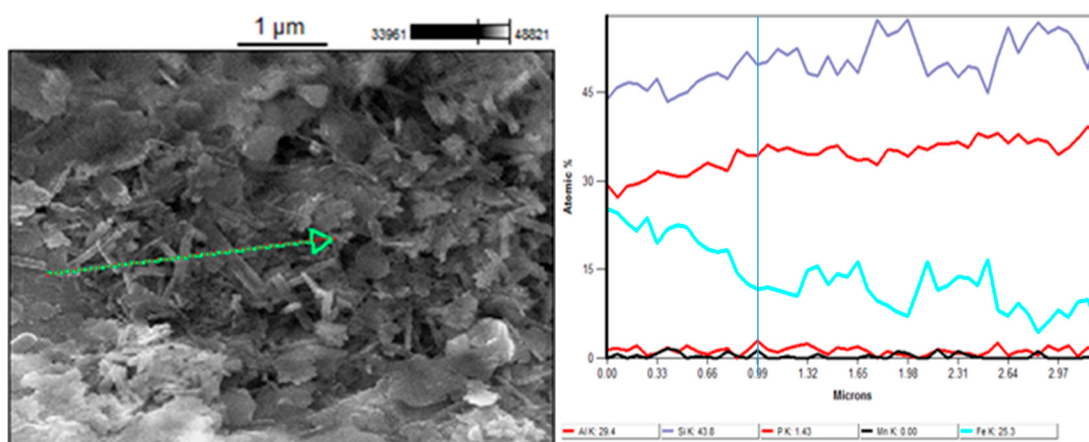

**Figure S1. SEM-EDS detection of non-magnetic BFS1 after phosphorus adsorption.**

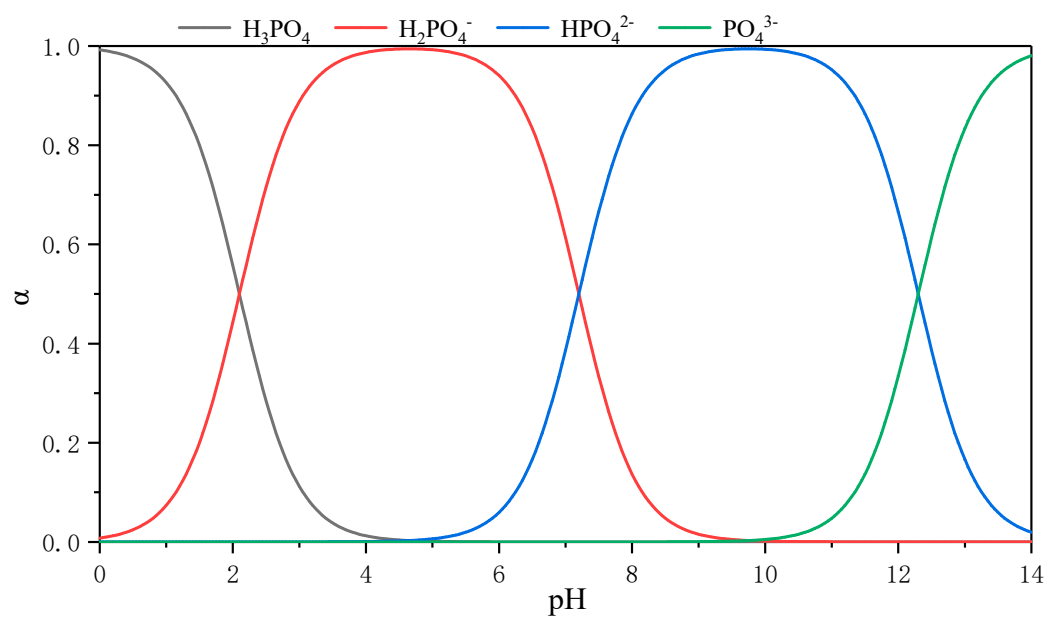

**Figure S2. Species of orthophosphate varied with the pH**
